# Supplementary material for: Hierarchical mesoporous SnO2 nanosheets on carbon cloth toward enhancing the polysulfides redox for lithium–sulfur batteries
Source: Royal Society of Chemistry journal article supplement (doi:10.1039/c7ta04937d), 2017-01-01
Supplement: c7ta04937d1.pdf [file c7ta04937d1.pdf]

## Supporting Information

### Hierarchical Mesoporous SnO<sub>2</sub> Nanosheets on Carbon Nanofibers toward Enhancing the Polysulfides Redox for Lithium-Sulfur batteries

*Maoxu Wang,<sup>a</sup> Lishuang Fan,<sup>\* b</sup> Xian Wu,<sup>a</sup> Da Tian,<sup>a</sup> Junhan Cheng,<sup>a</sup> Yue Qiu,<sup>a</sup>*

*Hexian Wu,<sup>a</sup> Bin Guan,<sup>a</sup> Naiqing Zhang,<sup>\*b,c</sup> Kening Sun<sup>b,c</sup>, and Yan Wang<sup>c</sup>*

a. School of Chemistry and Chemical Engineering, Harbin Institute of Technology, Harbin 150001, China

b. State Key Laboratory of Urban Water Resource and Environment, Harbin Institute of Technology, Harbin 150001, China

c. Academy of Fundamental and Interdisciplinary Sciences, Harbin Institute of Technology, Harbin 150001, China

#### Experiment

**Synthesis of C@SnS<sub>2</sub>:** Thioacetamide (0.064 g) and SnCl<sub>4</sub> (0.064g) were added to a 100 mL Teflon-lined stainless steel autoclave containing 40 mL isopropanol and sonicated until all the materials were dissolved. Afterwards, a piece of carbon cloth ( $\Phi$  =1 cm) was inserted into the autoclave and heated at 180 °C for 24 h. After cooling to room temperature naturally, the carbon cloth was taken out by a tweezer, rinsed with water and ethanol for at least 5 times and then dried in the oven at 80 °C overnight.

**Synthesis of C@SnO<sub>2</sub>:** The as-prepared C@SnS<sub>2</sub> was placed in a quartz boat, and calcined at 500 °C for 2 h in a furnace under the air atmosphere. After cooling to room temperature, C@SnO<sub>2</sub> was obtained. The mass loading of SnO<sub>2</sub> on CNFs was about 1.24 mg cm<sup>-2</sup>.

**Synthesis of the C@SnS<sub>2</sub>/S and C@SnO<sub>2</sub>/S:** To uniformly distribute sulfur in the C@SnS<sub>2</sub> composite, 0.1 g of sulfur was dissolved in 2 mL of CS<sub>2</sub>. Dry C@SnS<sub>2</sub> composite was completely soaked in the CS<sub>2</sub> solution for 5 min, and then dried out at 40 °C for 12 h. Finally, the C@SnS<sub>2</sub>/S composite was placed in an autoclave and heated at 155 °C for 24 h to obtain the uniform C@SnS<sub>2</sub>/S composite, with an average sulfur mass loading between 1.2 and 1.4 mg cm<sup>-2</sup>. The C@SnO<sub>2</sub>/S was prepared by the same method. And the average sulfur mass loading for C@SnO<sub>2</sub>/S was between 1.2 and 1.4 mg cm<sup>-2</sup> too.

### **Visualized adsorption test**

Li<sub>2</sub>S<sub>4</sub> solution was prepared by adding Li<sub>2</sub>S and sulfur at a molar ratio of 1:3 in DME followed by vigorous magnetic stirring. Solutions with Li<sub>2</sub>S<sub>4</sub> concentration of 10 mmol L<sup>-1</sup> (1.4 mg mL<sup>-1</sup>) were used for adsorption test. Typically, 15 mg of CNFs, C@SnS<sub>2</sub> and C@SnO<sub>2</sub> composites were added to 3.0 mL of Li<sub>2</sub>S<sub>4</sub>/DME solutions separately, and the mixtures were vigorously stirred to realize thorough adsorption. 3.0 mL Li<sub>2</sub>S<sub>4</sub>/DME solution was used as a comparison.

**Material Characterization:** The morphology and microstructure characterization for C@SnS<sub>2</sub> and C@SnO<sub>2</sub> was conducted using a SEM (Hitachi, SU8010)<sup>1</sup> and HRTEM (G2 F20FEI Tecnai G2 F20 microscope at 200 kV).<sup>2</sup> Elemental mapping was performed with SEM. The crystal structure was characterized by X-ray diffraction (PANalytical X'Pert PRO, monochromated Cu K $\alpha$  radiation 40 mA, 40 kV).<sup>3</sup> The method used in the paper is flat sample stage. Step size is 0.013°, scan range from 5° to 90° with a scan rate 1°/min. The sulfur content in the composite was tested by TG thermogravimetric

analyzer system. The specific surface area, pore volume and N<sub>2</sub> adsorption/desorption isotherms were measured by using an ASAP 2020 (Micromeritics). X-ray photoelectron spectroscopy (XPS) was performed using a Thermo Scientific K-Alpha XPS (Fisher Scientific Ltd, Nepean, ON)<sup>4, 5</sup>. The energy resolution is 0.5 eV and the step size is 0.1 eV.

**Electrochemical Measurements:** The C@SnO<sub>2</sub>/S composite was incorporated into 2025 coin-type cells. The C@ SnO<sub>2</sub>/S material was employed as the cathode without any polymer binder; lithium foil was used as the anode, and Celgard 3501 sheets as the separator. The 2025 coin cells were assembled with Li metal disc as anode in a glovebox filled with Ar. The electrolyte was composed of 1mol/L lithium bis (trifluoromethanesulfonyl) imide (LiTFSI) in a solvent of 1, 3-dioxolane (DOL) and dimethoxymethane (DME) (1:1 ratio by volume) with 2% LiNO<sub>3</sub> addition. CV test was recorded on a CHI 660D electrochemical workstation between 1.5 and 3.0 V. The charge transfer kinetics was investigated by EIS measurements using a PARSTAT 2273 advanced electrochemical system, the frequency range was set between 1 MHz and 1Hz and the amplitude is 10 mV with an ac signal. And the measurement time is about 24 h after cell assembly for the cell which was before discharging. The measurement time is about 5 min for the cell which was after 1000th cycles. A Neware battery test system is used to perform charge/discharge measurements, the voltage window is 1.7–2.8 V for various current rates (1 C is equivalent to 1675 mA/g).

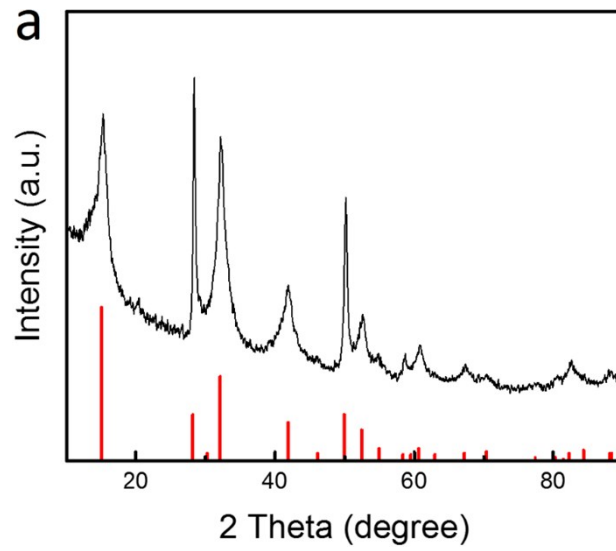

**Figure S1.** XRD patterns of the C@ SnS<sub>2</sub>.

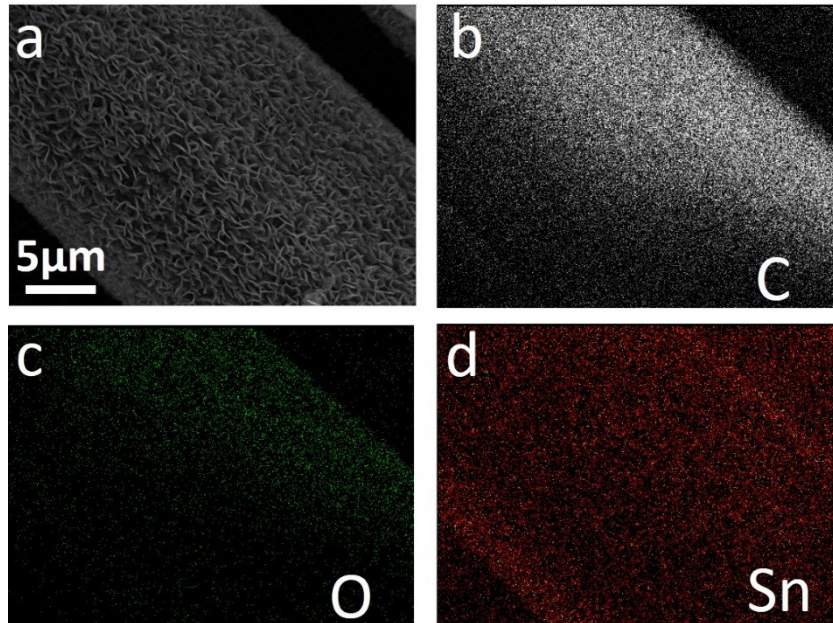

**Figure S2.** a) SEM image of the C@SnO<sub>2</sub>. b-d) EDS element mapping images of b) C, c) O, d) Sn in the selected regions.

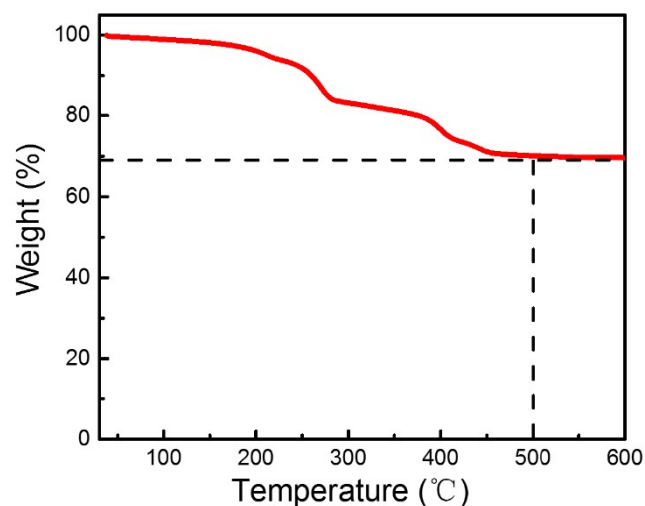

**Figure S3.** a) Thermal gravity analysis (TGA) curve of  $\text{SnS}_2$  materials. There is no obvious phase transformation when temperature over  $500\text{ }^\circ\text{C}$ , which indicated  $\text{SnS}_2$  have been converted to  $\text{SnO}_2$  when the temperature reach  $500\text{ }^\circ\text{C}$ .

**Table 1.** Element content of  $\text{SnO}_2$  materials

| Name             | C     | Sn    | O     |
|------------------|-------|-------|-------|
| Atomic ratio (%) | 19.96 | 26.35 | 52.69 |

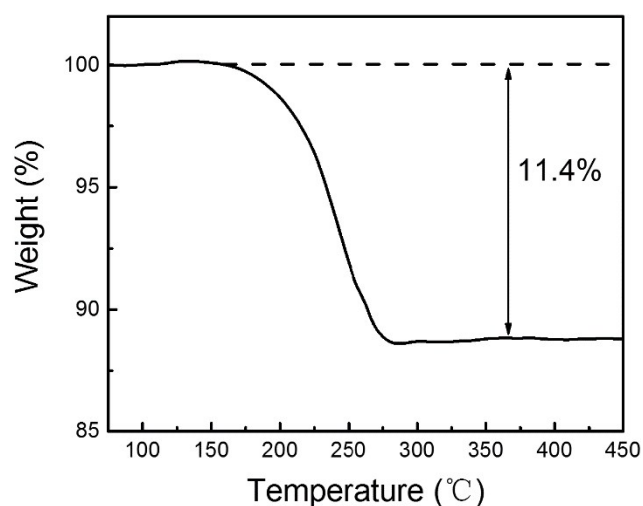

**Figure S4.** Thermal gravity analysis (TGA) curve of  $\text{C@SnO}_2/\text{S}$  composites.

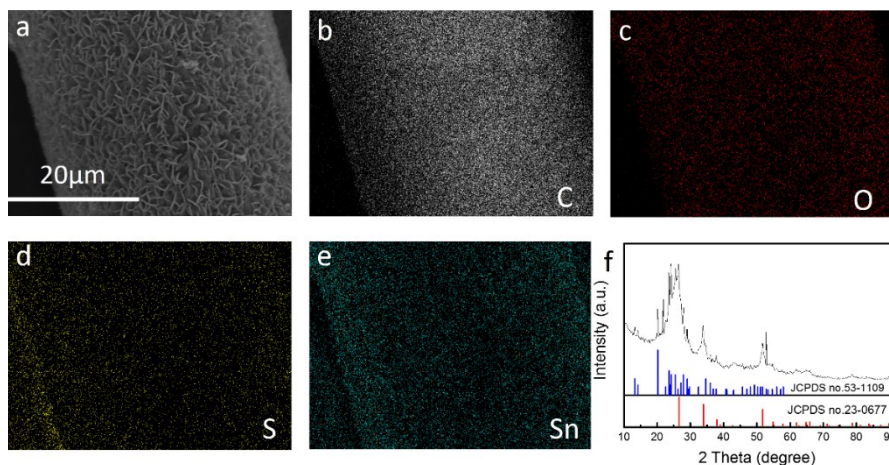

**Figure S5.** a) SEM image of the  $\text{C@SnO}_2/\text{S}$ . b-e) EDS element mapping images of b) C, c) O, d) S, e) Sn in the selected regions and the XRD patterns of  $\text{C@SnO}_2/\text{S}$ .

**Table 2.** Electrochemical performance of Li-S cells basing on different self-standing materials

| Materials type            | Rate   | Initial Capacity (mAh/g) | Cycled capacity (mAh/g) | decay per cycle | Ref.      |
|---------------------------|--------|--------------------------|-------------------------|-----------------|-----------|
| MWCNT                     | 0.2C   | 1446                     | 962 (50th)              | 0.66%           | 6         |
| N-doped graphene papers   | 0.2 C  | 1300                     | 1000 (100th)            | 0.23%           | 7         |
| CNT/ACNF@MnO <sub>2</sub> | 0.5C   | 822                      | 618 (300th)             | 0.11%           | 8         |
| VN/G                      | 2 C    | 1128                     | 917 (200th)             | 0.09%           | 9         |
| WS <sub>2</sub> /CCI      | 0.05 C | 1500                     | 1201 (100th)            | 0.2%            | 10        |
| C@SnO <sub>2</sub>        | 0.2 C  | 1228                     | 1101 (100th)            | 0.1%            | This work |
|                           | 1C     | 883                      | 754 (500th)             | 0.029%          |           |
|                           | 2 C    | 745                      | 564 (1000th)            | 0.024%          |           |

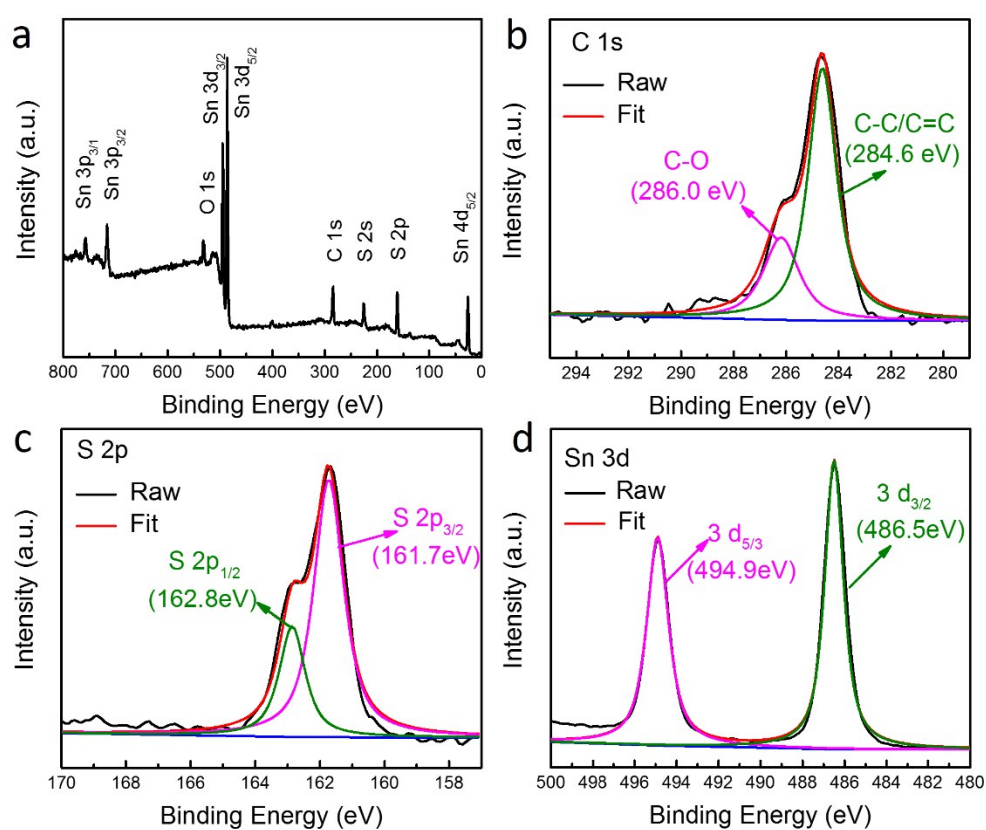**Figure S6.** a) Wide-scan survey XPS spectrum of C@SnS<sub>2</sub>. b–d) Elemental XPS spectra of C@SnS<sub>2</sub>: C 1s (b), S 2p (c), and Sn 3d (d). This data was used to identify the bonding characteristics and to obtain an accurate surface composition of the as-synthesized SnS<sub>2</sub> composites.

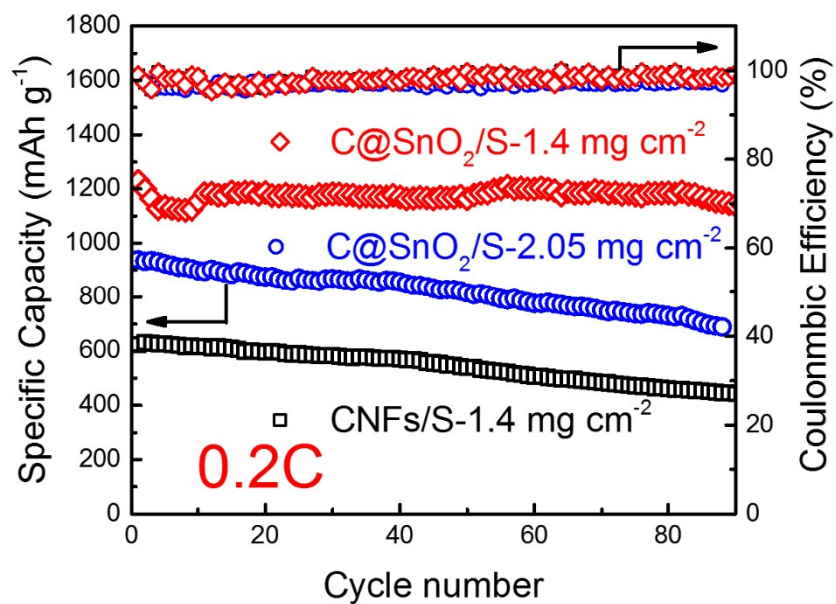

**Figure S7.** Cycling at 0.2C over 88 cycles of C@SnO<sub>2</sub>/S and CNFs/S with the different mass loading.

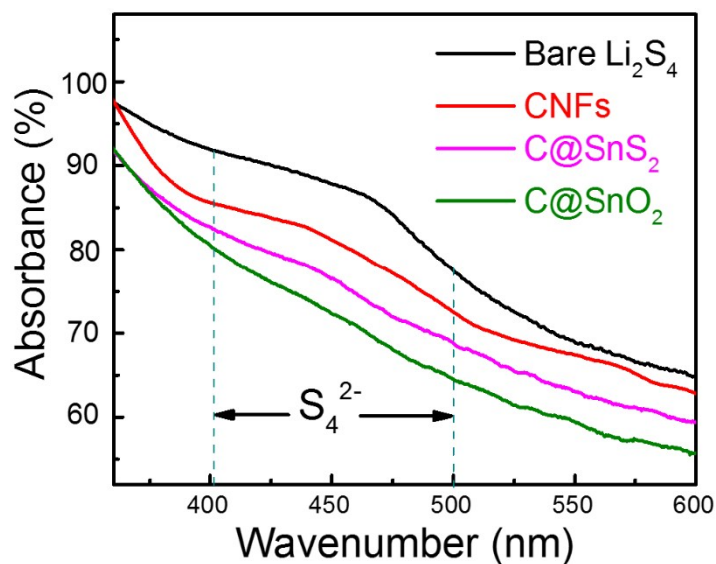

**Figure S8.** UV-vis spectra of the Li<sub>2</sub>S<sub>4</sub> solution exposure to CNFs, C@SnS<sub>2</sub> and C@SnO<sub>2</sub> materials.

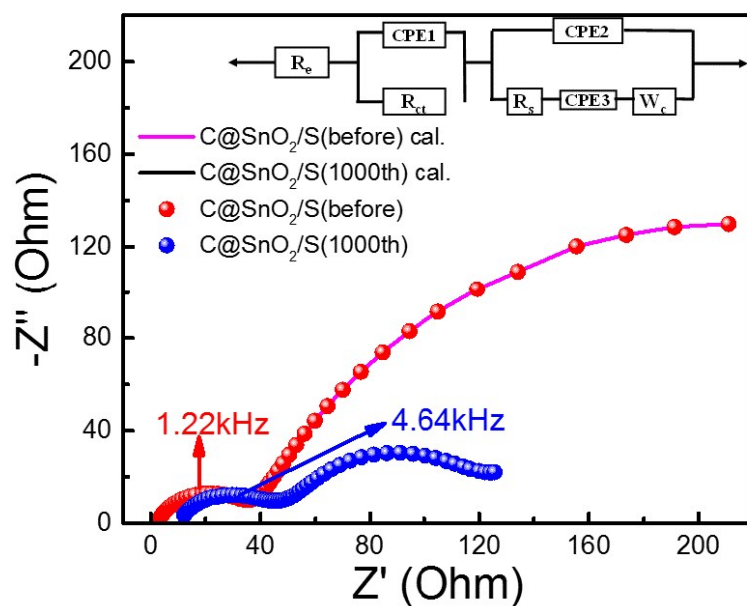

**Figure S9.** Electrochemical impedance spectra of before discharged and after 1000th discharged C@SnO<sub>2</sub>/S composites.  $R_e$  is the impedance contributed by the resistance of the electrolyte,  $R_{ct}$  represents the charge transfer resistance between the electrolyte and sulfur electrode,  $R_s$  is the deposit diffusion resistance of SEI film, and  $W_c$  is the Warburg impedance owing to the diffusion of the polysulfides within the cathode.

**Table 3.** Impedance parameters simulated from the equivalent circuits

| Cycle number        | $R_e(\Omega)$ | $R_{ct}(\Omega)$ | $R_s(\Omega)$ |
|---------------------|---------------|------------------|---------------|
| Before discharge    | 3.06          | 41.49            | -             |
| After 1000th cycles | 11.09         | 44.91            | 61.42         |

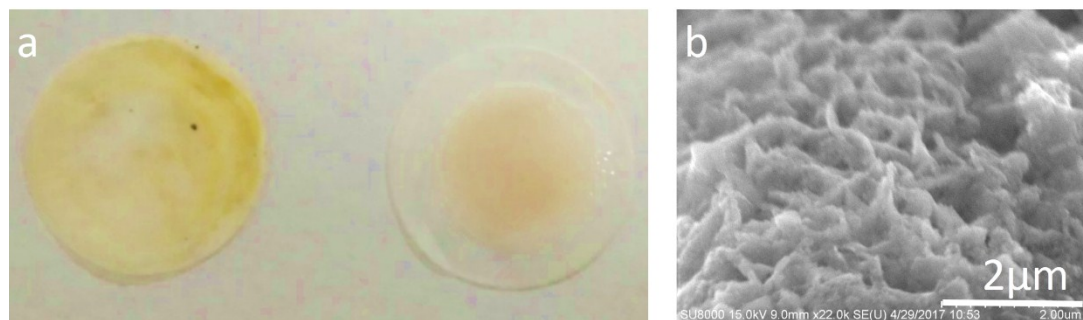

**Figure S10.** a) Photographs of the separators in the cells with C@SnS<sub>2</sub>/S electrode (left) and with (right) C@SnO<sub>2</sub>/S electrode after 1000th discharge at 2C rate. b) SEM image of the C@SnO<sub>2</sub>/S electrode discharged at 2C after 1000th cycles.



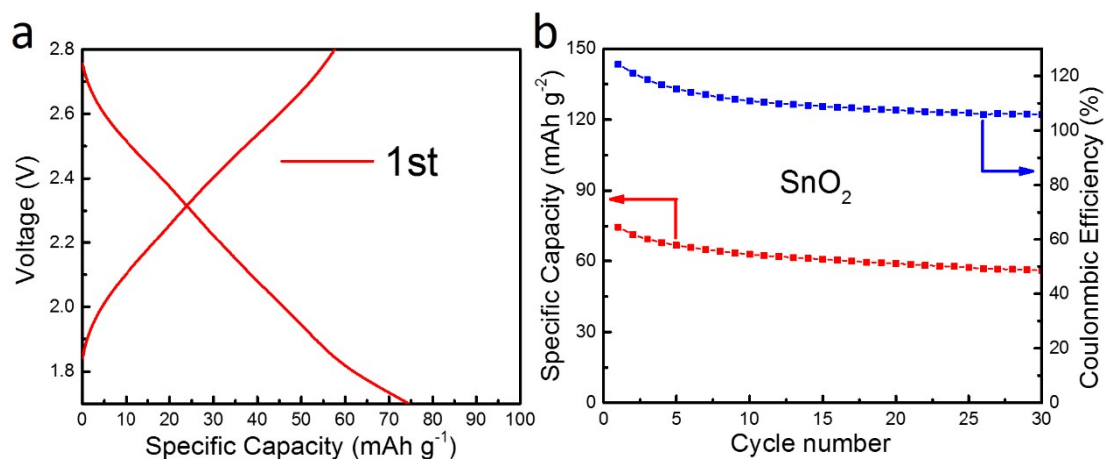

**Figure S11.** a) Representative charge–discharge voltage profiles at 0.2 C for SnO<sub>2</sub>. b) Cycling at 0.2 C over 30 cycles of SnO<sub>2</sub>. (0.2 C is based on the 1.4 mg/cm<sup>2</sup> of sulfur where 1C = 1675 mA/g).

**Table 4.** Electrochemical performance of Li–S cells basing on SnO<sub>2</sub> materials

| Materials type        | Rate   | Initial Capacity (mAh/g) | Cycled capacity (mAh/g) | decay per cycle | Ref.      |
|-----------------------|--------|--------------------------|-------------------------|-----------------|-----------|
| C@SnO <sub>2</sub> /s | 0.2 C  | 1228                     | 1101 (100th)            | 0.1%            | This work |
|                       | 1C     | 883                      | 754 (500th)             | 0.029%          |           |
|                       | 2 C    | 745                      | 564 (1000th)            | 0.024%          |           |
| S/SnO <sub>2</sub> @C | 0.12 C | 1473                     | 764 (100th)             | 0.48%           | 11        |
|                       | 0.24C  | 989                      | 781 (100th)             | 0.21%           |           |
|                       | 1.91 C | 644                      | 616 (100th)             | 0.043%          |           |
| S/SnO <sub>2</sub>    | 0.8 C  | 700                      | 500 (100th)             | 0.28%           | 12        |

## REFERENCES

1. H. Lv, Y. Guo, Z. Yang, Y. Cheng, L. P. Wang, B. Zhang, Y. Zhao, Z. J. Xu and G. Ji, *J. Mater. Chem. C*, 2017, **5**, 491-512.
2. L. Li, W. Wang, Y. Chai, H. Li, M. Tian and T. Zhai, *Advanced Functional Materials*, 2017, DOI: 10.1002/adfm.201701011, 1701011.
3. H. Lv, Y. Guo, Y. Zhao, H. Zhang, B. Zhang, G. Ji and Z. J. Xu, *Carbon*, 2016, **110**, 130-137.
4. L. Fan, Y. Zhang, Q. Zhang, X. Wu, J. Cheng, N. Zhang, Y. Feng and K. Sun, *Small*, 2016, **12**, 5208-5216.
5. L. Li, W. Wang, L. Gan, N. Zhou, X. Zhu, Q. Zhang, H. Li, M. Tian and T. Zhai, *Advanced Functional Materials*, 2016, **26**, 8281-8289.
6. Y. S. Su and A. Manthiram, *Chemical communications*, 2012, **48**, 8817-8819.
7. K. Han, J. Shen, S. Hao, H. Ye, C. Wolverton, M. C. Kung and H. H. Kung, *ChemSusChem*, 2014, **7**, 2545-2553.
8. H. Xu, L. Qie and A. Manthiram, *Nano Energy*, 2016, **26**, 224-232.
9. Z. Sun, J. Zhang, L. Yin, G. Hu, R. Fang, H. M. Cheng and F. Li, *Nature communications*, 2017, **8**, 14627.
10. J. Park, B.-C. Yu, J. S. Park, J. W. Choi, C. Kim, Y.-E. Sung and J. B. Goodenough, *Advanced Energy Materials*, 2017, DOI: 10.1002/aenm.201602567, 1602567.
11. B. Cao, Li, B. Hou, Y. Mo, L. Yin and Y. Chen, *ACS applied materials & interfaces*, 2016, DOI: 10.1021/acsami.6b09918.
12. L. P. Zhang, Y. F. Wang, S. Q. Gou and J. H. Zeng, *The Journal of Physical Chemistry C*, 2015, **119**, 28721-28727.
